# Supplementary material for: Elevating EGFR-MAPK program by a nonconventional Cdc42 enhances intestinal epithelial survival and regeneration
Source: PubMed Central journal article supplement (PMC7455142; doi:10.1172/jci.insight.135923), 2020-08-20

**SUPPLEMENTARY INFORMATION:**

Elevating EGFR-MAPK program by a non-conventional Cdc42 enhances intestinal epithelial survival and regeneration

*Zhang et al.*

**Suppl. Table 1.** Cdc42-interacting proteins identified in Cdc42 V1 and V2 proteomics.

| Proteins Identified                                      | Spectra counts (V1) | Spectra counts (V2) | Unique Peptide (V1) | Unique Peptide (V2) |
|----------------------------------------------------------|---------------------|---------------------|---------------------|---------------------|
| Desmoplakin                                              | 150                 | 52                  | 82                  | 36                  |
| Actin, cytoplasmic 1                                     | 89                  | 49                  | 1                   | 1                   |
| Actin, cytoplasmic 2                                     | 89                  | 49                  | 19                  | 16                  |
| Ras GTPase-activating-like protein IQGAP1                | 84                  | 68                  | 50                  | 49                  |
| Junction plakoglobin                                     | 65                  | 20                  | 29                  | 14                  |
| Desmoglein-1                                             | 60                  | 17                  | 24                  | 10                  |
| Ras GTPase-activating-like protein IQGAP2                | 45                  | 35                  | 35                  | 28                  |
| Protein phosphatase 1B                                   | 44                  | 25                  | 16                  | 11                  |
| Tubulin alpha-1B chain                                   | 42                  | 31                  | 17                  | 15                  |
| Tubulin alpha-1A chain                                   | 38                  | 29                  | 21                  | 18                  |
| Rho GDP-dissociation inhibitor 1                         | 34                  | 10                  | 10                  | 6                   |
| Myosin-9                                                 | 32                  | 13                  | 27                  | 12                  |
| Cell division control protein 42                         | 30                  | 12                  | 10                  | 4                   |
| 14-3-3 protein epsilon                                   | 27                  | 13                  | 11                  | 5                   |
| TGF-beta-activated kinase 1 and MAP3K7-binding protein 1 | 24                  | 19                  | 13                  | 10                  |
| Mitogen-activated protein kinase kinase kinase 7         | 17                  | 8                   | 11                  | 6                   |
| Annexin A1                                               | 17                  | 12                  | 10                  | 11                  |
| Clathrin heavy chain 1                                   | 14                  | 7                   | 12                  | 7                   |
| Serine/threonine-protein kinase 38                       | 14                  | 5                   | 9                   | 4                   |
| Myosin light polypeptide 6                               | 10                  | 3                   | 6                   | 2                   |
| Proliferating cell nuclear antigen                       | 10                  | 9                   | 7                   | 7                   |
| Myosin-10                                                | 8                   | 2                   | 6                   | 2                   |
| Mitogen-activated protein kinase 1                       | 7                   | 3                   | 5                   | 3                   |
| Ras GTPase-activating-like protein IQGAP3                | 7                   | 8                   | 2                   | 6                   |
| Dynactin subunit 2                                       | 4                   | 3                   | 2                   | 1                   |
| Serine/threonine-protein kinase PAK 4                    | 4                   | 1                   | 3                   | 1                   |
| Growth factor receptor-bound protein 2                   | 4                   | 1                   | 4                   | 1                   |
| Annexin A11                                              | 4                   | 2                   | 4                   | 2                   |
| AP-2 complex subunit alpha-1                             | 3                   | 1                   | 3                   | 1                   |
| Actin-related protein 2/3 complex subunit 2              | 3                   | 1                   | 3                   | 1                   |
| Actin-related protein 2/3 complex subunit 4              | 3                   | 1                   | 3                   | 0                   |
| AP-2 complex subunit beta                                | 2                   | 1                   | 2                   | 1                   |

## Supplementary Figure Legends:

### Suppl. Fig. 1

- (A) Bright field images of representative of WT and Cdc42<sup>ΔIEC</sup> enteroids.
- (B) Bright field images of representative WT and iKO enteroid after 72 hours of 4-OHT treatment.
- (C) Enteroids from WT or Cdc42<sup>ΔIEC</sup> mice were treated with or without CHIR99021 for 24 hours immediately after seeding to Matrigel. Quantification of enteroid viability was from 3 independent experiments.
- (D) Cdc42 GLISA assay based on OD490 luminescence showed that Cdc42 activity was increased with different intensities in serum starved Caco2 cells by EGF, TGF $\alpha$ , Wnt3a, Noggin, R-spondin, or a combination of Wnt3a and EGF. Reading of OD490 were collected at 0 min (without growth factors), 1.5 min, 3 min, 6 min and 12 min after addition of growth factor.
- (E) 3D representation of Flag-Cdc42 V1 and V2 interactomes identified in the proteomic analysis. Purple and red dots represent V1- and V2-specific interactor while gray dots are proteins associated with both. Note that a single dot might represent multiple proteins having identical numbers of peptide spectrum.
- (F) List of Cdc42-associated proteins, detected by proteomic analysis, which are known to mediate clathrin endocytosis, regulate actin organization, and affect MAPK signaling.
- (G) Phospho-kinase array analysis of 43 kinase targets in Cdc42-V1 or V2 overexpressing HEK293T cells compared to empty vector transfected cells.
- (H) Co-immunoprecipitation using HEK293T cell lysates overexpressing empty vector, Flag-V1 or Flag-V2 showed that PAK1 bound equally to both Cdc42 variants in soluble cellular fractions. R, detergent-resistant; S, soluble.

### Suppl. Fig. 2

- (A) Immunohistochemistry for cleaved caspase 3 on enteroids at indicated time points after 4-OHT treatment. Red arrows pointed to cleaved caspase 3+ cells.
- (B) Quantification of percentage of cells showing cleaved caspase 3 staining at indicated time points after 4-OHT addition.
- (C) EasN analysis of Cdc42 interactomes showed protein networks known to involve in EGFR endocytosis and MAPK signaling.

### Suppl. Fig. 3

- (A) RT-PCR detection of mRNAs of both Cdc42 variants in mouse enteroids.
- (B) Cdc42 V2 specific antibody detected V2 expression in WT fetal mouse intestines. HEK239T cells overexpressing V2 was used as a positive control.

### Suppl. Fig. 4.

- (A-B) Quantification of intestinal villus length and crypt number from 3 animals per genotype.
- (C) Immunohistochemistry of Cox1+ cells, with red arrowhead pointing at Cox1+ cells.
- (D-E) Immunohistochemistry for DCLK1+ Tuft cells and quantification from 3 animals per genotype.
- (F) High magnification images of Alkaline phosphatase (AP) staining showed representative AP+ inclusion bodies (arrows) in KO IECs.

**Suppl. Fig. 5**

(A) qRT-PCR for ISC markers in  $V2^{Tg}$  mice relative to WT mice showed significant increase of Bmi1, Hopx and Lgr5. N=3 for each genotype.

(B) Western blots showed increased  $\beta$ -catenin protein level in  $V2^{Tg}$  small intestine. Decreased  $\beta$ -catenin expressions in KO mouse ileum and colon were rescued by Cdc42-V2 in Cdc42KO;  $V2^{Tg}$  mice.

(C) Immunohistochemistry for  $\beta$ -catenin showed increased nuclear  $\beta$ -catenin in  $V2^{Tg}$  crypt cells. N=2 for each genotype.

**Suppl. Fig. 6**

(A-B) Representative images and quantifications showing the gross intestinal morphology of designated genotypes 7 days after irradiation. Note a clear elongation of  $V2^{Tg}$  gut length and a severe shortening of KO gut.

(C) H&E stained post-irradiation ileal sections of designated genotypes 3 days after irradiation.

(D) IHC images of Olfm4+ crypts 3 days post irradiation.

(E) Olfm4+ crypts were quantified from multiple ileal sections of 3 post-irradiation animals per genotype.

## KEY RESOURCES TABLE

| REAGENT or RESOURCE                       | SOURCE                  | IDENTIFIER          |
|-------------------------------------------|-------------------------|---------------------|
| Antibodies                                |                         |                     |
| Rabbit anti-p-ERK                         | Cell Signaling          | 9101s               |
| Rabbit anti-ERK                           | Cell Signaling          | 4695s               |
| Mouse anti- $\beta$ -Catenin              | BD Biosciences          | 610153              |
| Rabbit anti-p-Lrp6                        | Cell Signaling          | 2568s               |
| Rabbit anti-Lrp6                          | Cell Signaling          | 3395S               |
| Mouse anti- $\beta$ -actin                | Santa Cruz              | sc-4778             |
| Rabbit anti-Clathrin                      | Cell Signaling          | 4796p               |
| Mouse anti- $\alpha$ -Tubulin             | Sigma-Aldrich           | T6199               |
| Rabbit anti-EGFR                          | Santa Cruz              | sc-03               |
| Rabbit anti-Cdc42                         | abcam                   | ab64533             |
| Rabbit anti-p-EGFR <sup>Y1068</sup>       | Cell Signaling          | 2234s               |
| Rabbit anti-PAK1                          | Cell Signaling          | 2602s               |
| Rabbit anti-Fyn                           | Cell Signaling          | 4023                |
| Mouse anti-Flotillin1                     | BD Biosciences          | 610820              |
| Rabbit anti-Caveolin1                     | Cell Signaling          | 3267s               |
| Rabbit anti-Calnexin                      | cell signaling          | 2433                |
| Rabbit anti-PI3K-P110                     | Cell Signaling          | 4255                |
| Rabbit anti-p-ERBB2 <sup>Y1221/1222</sup> | Cell Signaling          | 2243T               |
| Rabbit anti-ERBB2                         | Cell Signaling          | 4290T               |
| Goat Anti-DDDDK tag                       | abcam                   | ab95045             |
| Mouse anti-pHH3                           | Cell Signaling          | 9706s               |
| Rabbit anti-Cdc42V2                       | El-Husseini, A.         | (Kang et al., 2008) |
| Rabbit anti-Cdc42V2                       | LifeSpan<br>BioSciences | LS-C153281          |
| Rabbit anti-EEA1                          | Cell Signaling          | 3288s               |
| Rabbit anti-EGFR                          | Cell Signaling          | 4267p               |
| Mouse anti-Flag                           | Sigma-Aldrich           | f1804               |
| Rabbit anti-Ki67                          | abcam                   | ab16637             |
| Goat anti-Lysozyme C                      | Santa Cruz              | sc-27958            |
| Goat anti-GFP                             | abcam                   | ab6673              |
| Rabbit anti-Cleaved Caspase3              | Cell Signaling          | 9664s               |
| Mouse anti-E-Cadherin (clone 36)          | BD Biosciences          | 610182              |
| Rabbit anti-Olfm4 (clone D6Y5A)           | Cell Signaling          | 39141               |
| Rabbit anti-lysozyme                      | Biogenex                | AR024-10R           |
| Rat anti-BrdU                             | Accurate<br>Chemical    | OBT0030G            |

|                                                  |                          |             |
|--------------------------------------------------|--------------------------|-------------|
| Donkey anti-Rabbit, Alexa Fluor 488              | Thermo Fisher Scientific | A-21206     |
| Donkey anti-Rabbit, Alexa Fluor 546              | Thermo Fisher Scientific | A10040      |
| Donkey anti-Goat, Alexa Fluor 488                | Thermo Fisher Scientific | A-11055     |
| Donkey anti-Goat, Alexa Fluor 555                | Thermo Fisher Scientific | A-21432     |
| Donkey anti-Rat, Alexa Fluor 488                 | Thermo Fisher Scientific | A-21208     |
| Donkey anti-Mouse, Alexa Fluor 555               | Thermo Fisher Scientific | A-31570     |
| Donkey anti-Mouse, Alexa Fluor 647               | Thermo Fisher Scientific | A-31571     |
| Biotinylated Horse Anti-Rabbit IgG               | Vector Laboratories      | BA-1100     |
| <b>Chemicals and Recombinant Proteins</b>        |                          |             |
| propidium iodide                                 | Sigma-Aldrich            | P4170       |
| CHIR99021                                        | Sigma-Aldrich            | SML1046-5MG |
| Corn oil                                         | Sigma-Aldrich            | C8267       |
| Tamoxifen                                        | Sigma-Aldrich            | T5648       |
| Citric acid                                      | Sigma-Aldrich            | 251275      |
| Donkey serum                                     | Sigma-Aldrich            | D9663       |
| Bovine Serum                                     | Sigma-Aldrich            | A3294       |
| EdU (5-ethynyl-20-deoxyuridine)                  | Thermo Fisher Scientific | A10044      |
| BrdU                                             | Invitrogen               | 00-0103     |
| Recombinant Murine Wnt-3a                        | Peptotech                | 315-20      |
| Recombinant Murine EGF                           | Peptotech                | 315-09 B    |
| Recombinant Murine Noggin                        | Peptotech                | 250-38      |
| Recombinant Murine R-spondin                     | R&D                      | 3474-RS-050 |
| <b>Critical Commercial Assays</b>                |                          |             |
| CDC42-specific GLISA assay                       | Cytoskeleton             | BK127       |
| Maxima Universal First Strand cDNA Synthesis Kit | Thermo Fisher Scientific | K1671       |
| Cell Titer-Glo 3D Cell Viability Assay           | Promega                  | G9681       |
| Flag Immunoprecipitation Kit                     | Sigma-Aldrich            | FLAGIPT1    |
| GoTaq Probe qPCR Master Mix                      | Promega                  | A6101/2     |
| Advanced DMEM/F12 medium                         | Thermo Fisher Scientific | 12634028    |
| Corning Recovery Solution                        | Corning                  | 354253      |
| 4',6-Diamidino-2-Phenylindole (DAPI)             | Thermo Fisher Scientific | D1306       |
| SignalStain EDTA Unmasking Solution              | Cell Signaling           | 14747       |
| DAKO Target Retrieval Solution                   | Agilent                  | S1699       |

|                                                                          |                           |                                                                                                                       |
|--------------------------------------------------------------------------|---------------------------|-----------------------------------------------------------------------------------------------------------------------|
| Prolong Gold antifade medium                                             | Thermo Fisher Scientific  | P36930                                                                                                                |
| VECTASTAIN Elite ABC HRP Kit (Peroxidase, Standard)                      | Vector Laboratories       | PK-6100                                                                                                               |
| RNeasy Plus Micro kit                                                    | QIAGEN                    | 74034                                                                                                                 |
| DAB Peroxidase (HRP) Substrate Kit (with Nickel), 3,30 -diaminobenzidine | Vector Laboratories       | SK-4100                                                                                                               |
| Click-iT EdU Alexa Fluor 555 Imaging Kit                                 | Thermo Fisher Scientific  | C10338                                                                                                                |
| Experimental Models, Cell lines                                          |                           |                                                                                                                       |
| Cdc42 flox                                                               | Brakebusch, C.            | (Wu et al., 2006)                                                                                                     |
| Cdc42 V2 <sup>Tg</sup>                                                   | This study                |                                                                                                                       |
| Villin-CreER                                                             | Robine, S.                | (El Marjou et al., 2004)                                                                                              |
| Rosa-ZsGreen                                                             | Jackson Lab               | 007906                                                                                                                |
| emEGFR                                                                   | Coffey, R.                | (Yang et al., 2017)                                                                                                   |
| B6.129P2-Lgr5 <sup>tm1(cre/ERT2)Cle/J</sup>                              | Jackson Lab               | 008875                                                                                                                |
| Human HEK293                                                             | ATCC                      | CRL-1573                                                                                                              |
| Human Caco2                                                              | ATCC                      | HTB-37                                                                                                                |
| Software and Algorithms                                                  |                           |                                                                                                                       |
| Prism                                                                    | GraphPad                  | <a href="https://www.graphpad.com/scientific-software/prism/">https://www.graphpad.com/scientific-software/prism/</a> |
| Fiji software                                                            | (Schindelin et al., 2012) | <a href="https://fiji.sc">https://fiji.sc</a>                                                                         |
| Recombinant DNAs                                                         |                           |                                                                                                                       |
| pcDNA6A-EGFR WT                                                          | Addgene                   | #42665                                                                                                                |
| pcDNA6A-EGFR ICD (645-1186)                                              | Addgene                   | #42667                                                                                                                |
| pcDNA6A-EGFR ECD (1-644)                                                 | Addgene                   | #42666                                                                                                                |
| CAG-3×Flag-Cdc42 V2                                                      | This study                |                                                                                                                       |
| PQCXIP-3×Flag-Cdc42V2-K185R                                              | This study                |                                                                                                                       |
| PQCXIP-3×Flag-Cdc42V1                                                    | This study                |                                                                                                                       |
| PQCXIP-3×Flag-Cdc42V2                                                    | This study                |                                                                                                                       |
| CAG-lox-CAT-lox-unique Bam cloning site-hGH polyA (Clone 17)             | Addgene                   | #53959                                                                                                                |
| PQCXIP-3×Flag                                                            | This study                |                                                                                                                       |

## SUPPLEMENTARY TABLE 1

### PCR and RT-PCR primers used in this study.

| Primer                           | Sequence                  |
|----------------------------------|---------------------------|
| PCR--mouse cdc42 V1-F            | TATGTATAGTCAGCGCGTGCCCTGT |
| PCR--mouse cdc42 V1-R            | CCACAGGCTGTCCTATGGTT      |
| PCR--mouse cdc42 V2-F            | GCGGAGAAGCTGAGGACAAGAT    |
| PCR--mouse cdc42 V2-R            | AAGAAGACGCAGAGGCTTTCA     |
| Realtime PCR--mouse cdc42 V1/2-F | CACTCCAGAGACTGCTGAAAAGC   |

|                                |                        |
|--------------------------------|------------------------|
| Realtime PCR--mouse cdc42 V1-R | TCATAGCAGCACACACCTGCG  |
| Realtime PCR--mouse cdc42 V2-R | TGGGTTGAGTTTCCGGAGGC   |
| Realtime PCR--mouse LRIG1-F    | AAGGGAACTCAACTTGGCGAG  |
| Realtime PCR--mouse LRIG1-R    | ACGTGAGGCCTTCAATCAGC   |
| Realtime PCR--mouse LGR5-F     | ACCCGCCAGTCTCCTACATC   |
| Realtime PCR--mouse LGR5-R     | GCATCTAGGCGCAGGGATTG   |
| Realtime PCR--mouse Bmi1-F     | GGAGAAGAAATGGCCCACTACC |
| Realtime PCR--mouse Bmi1-R     | TTGGCCTTGTCACCTCCAGA   |
| Realtime PCR--mouse HopX-F     | CATCCTTAGTCAGACGCGCA   |
| Realtime PCR--mouse HopX-R     | AGGCAAGCCTTCTGACCGC    |
| Realtime PCR--mouse Olm4-F     | TGGCCCTTGGGAAGCTGTAGT  |
| Realtime PCR--mouse Olm4-R     | ACCTCCTTGGCCATAGCGAA   |
| Realtime PCR--mouse Hprt-F     | TCCCTGGTTAAGCAGTACAGC  |
| Realtime PCR--mouse Hprt-R     | TCCAACAAAGTCTGGCCTGT   |

### References cited for experimental procedure

- El Marjou, F., Janssen, K.-P., Hung-Junn Chang, B., Li, M., Hindie, V., Chan, L., Louvard, D., Chambon, P., Metzger, D., and Robine, S. (2004). Tissue-specific and inducible Cre-mediated recombination in the gut epithelium. *genesis* 39, 186-193.
- Kang, R., Wan, J., Arstikaitis, P., Takahashi, H., Huang, K., Bailey, A.O., Thompson, J.X., Roth, A.F., Drisdell, R.C., Mastro, R., *et al.* (2008). Neural palmitoyl-proteomics reveals dynamic synaptic palmitoylation. *Nature* 456, 904-909.
- Schindelin, J., Arganda-Carreras, I., Frise, E., Kaynig, V., Longair, M., Pietzsch, T., Preibisch, S., Rueden, C., Saalfeld, S., Schmid, B., *et al.* (2012). Fiji: an open-source platform for biological-image analysis. *Nature methods* 9, 676-682.
- Wu, X., Quondamatteo, F., Lefever, T., Czuchra, A., Meyer, H., Chrostek, A., Paus, R., Langbein, L., and Brakebusch, C. (2006). Cdc42 controls progenitor cell differentiation and  $\beta$ -catenin turnover in skin. *Genes & Development* 20, 571-585.
- Yang, Y.P., Ma, H., Starchenko, A., Huh, W.J., Li, W., Hickman, F.E., Zhang, Q., Franklin, J.L., Mortlock, D.P., Fuhrmann, S., *et al.* (2017). A Chimeric Egfr Protein Reporter Mouse Reveals Egfr Localization and Trafficking In Vivo. *Cell Rep* 19, 1257-1267.

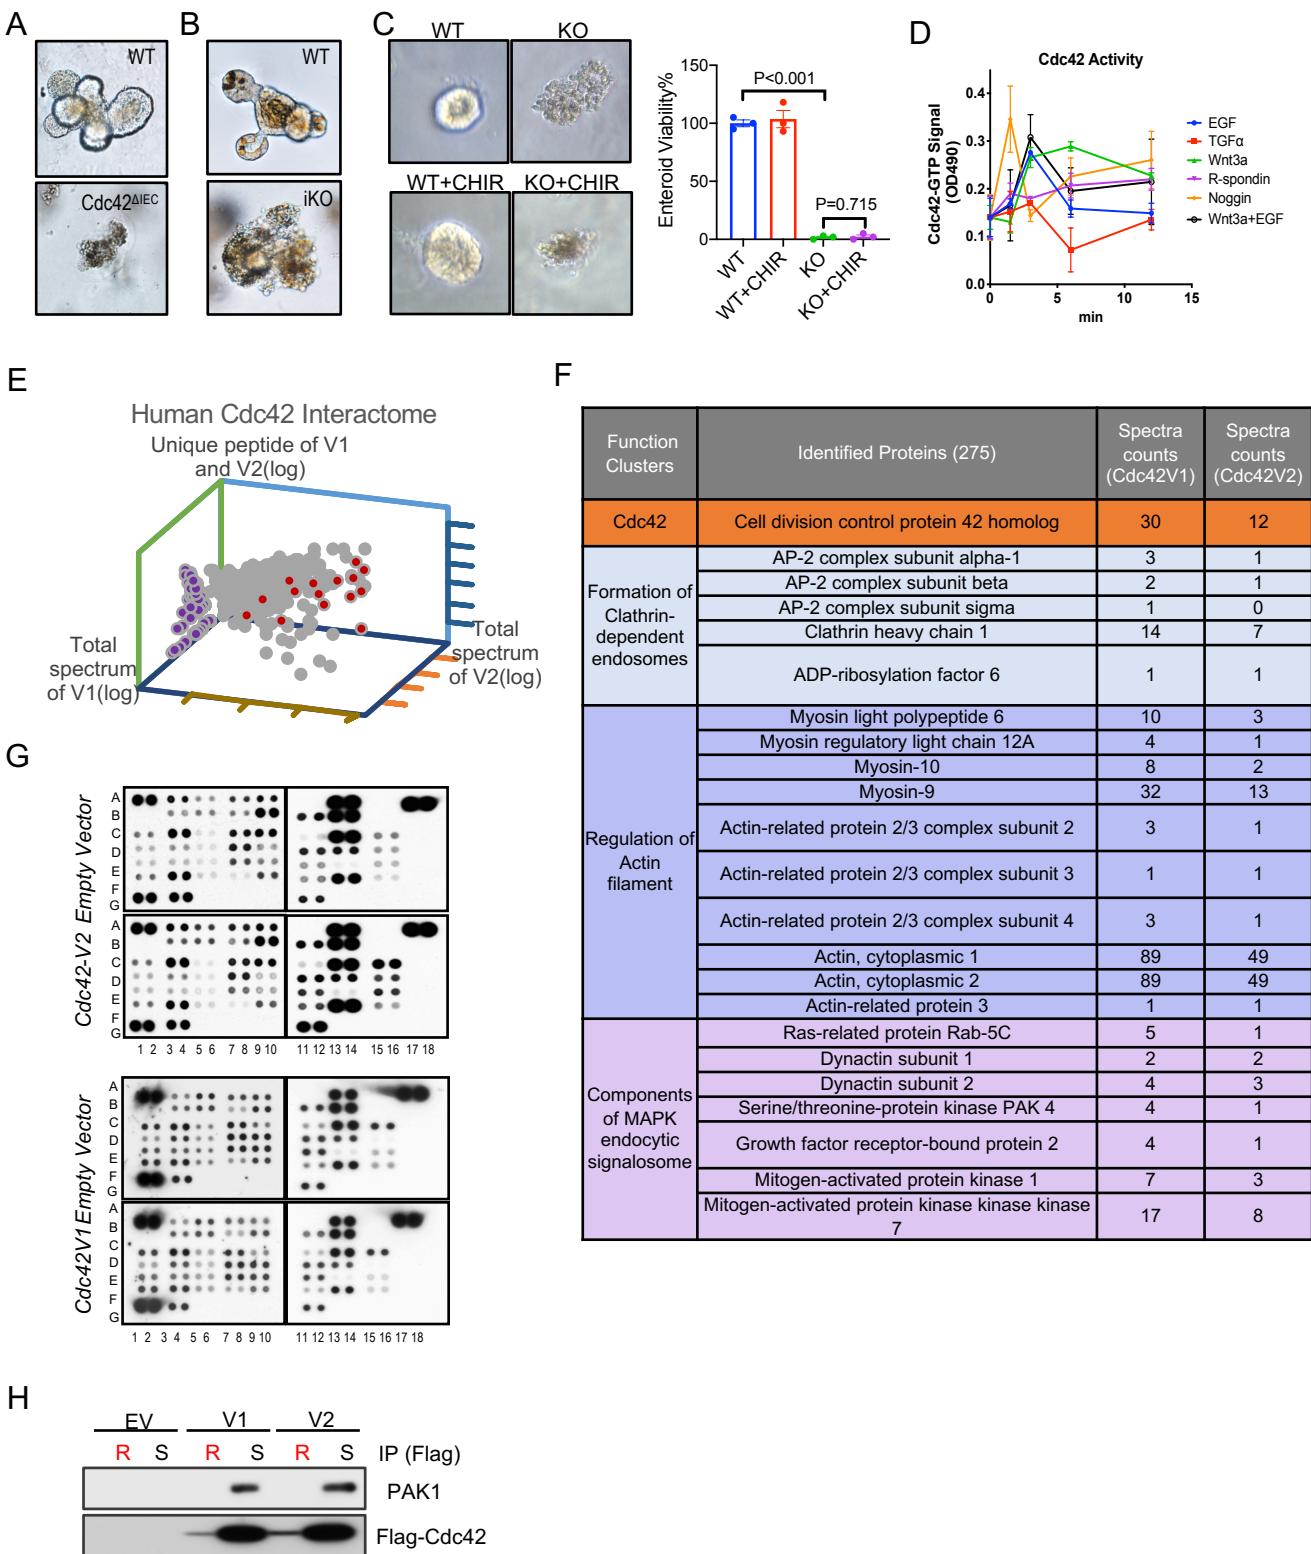



A

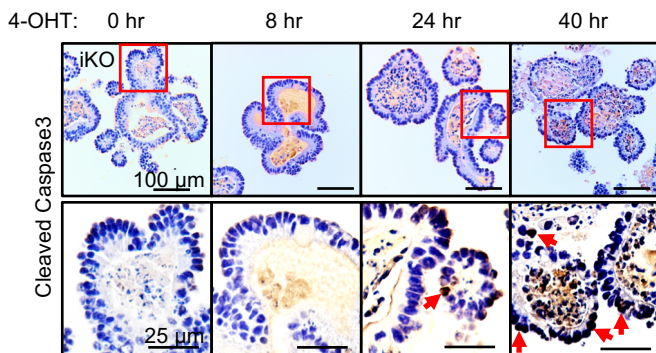

B

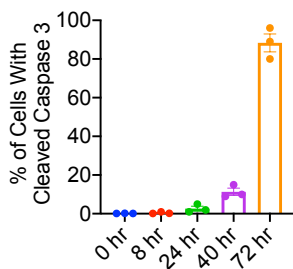

C

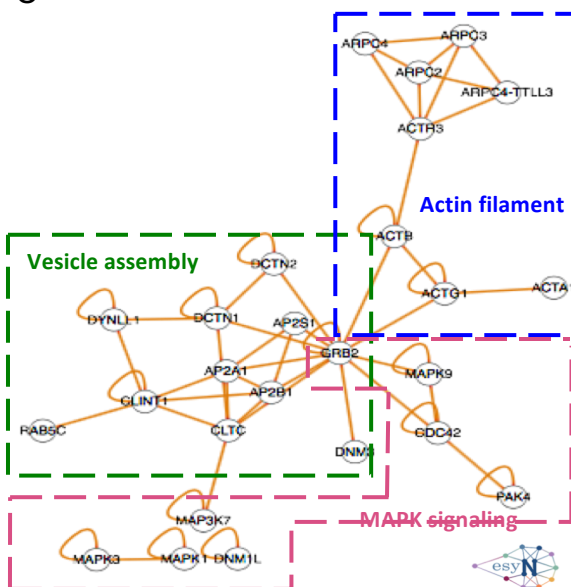

A

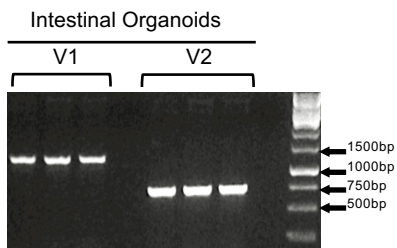

B

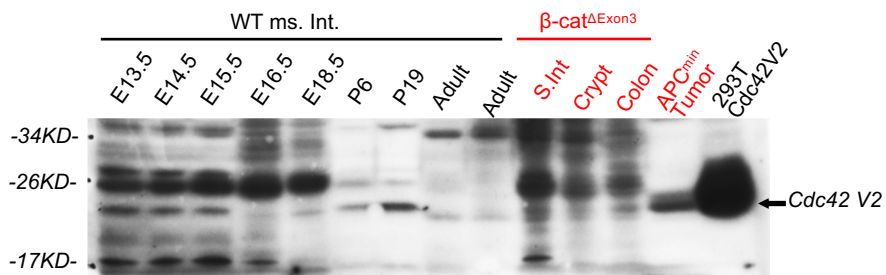

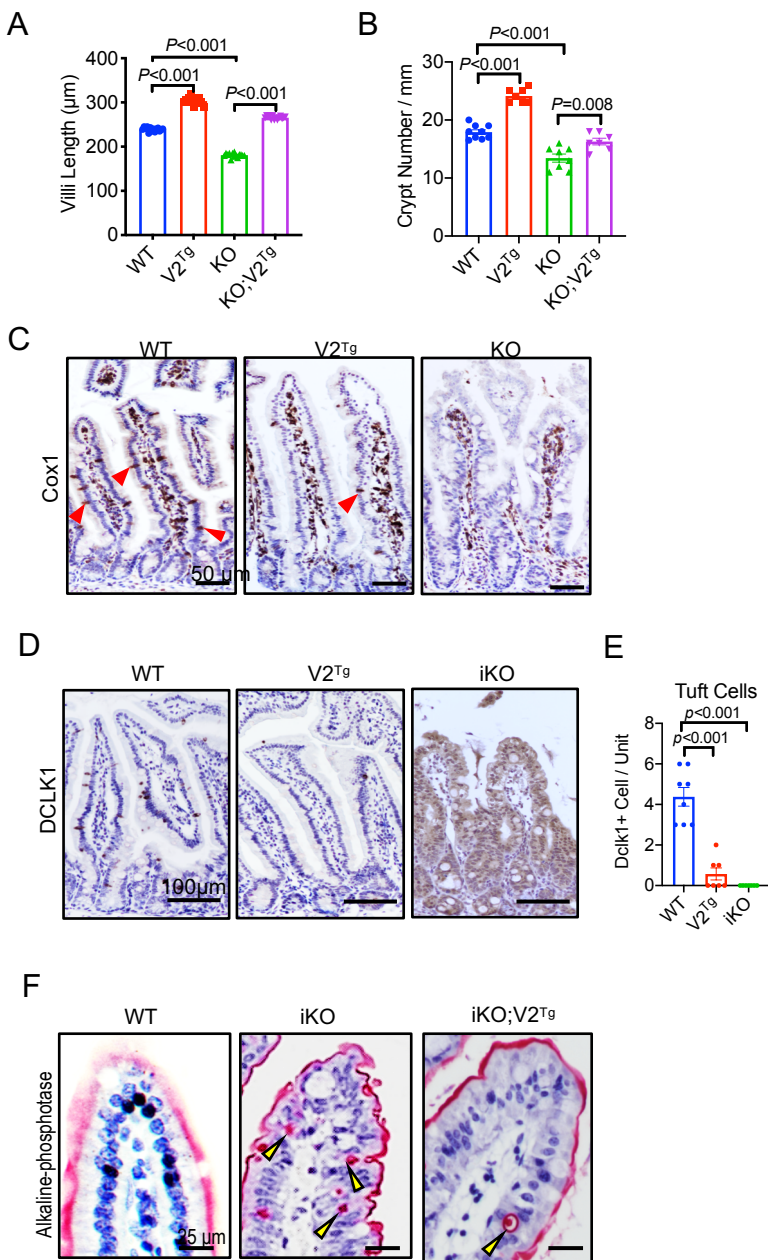

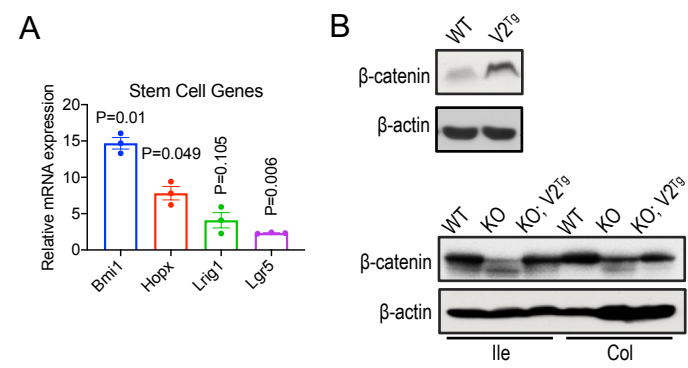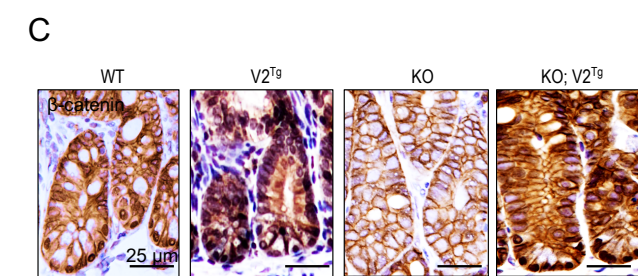

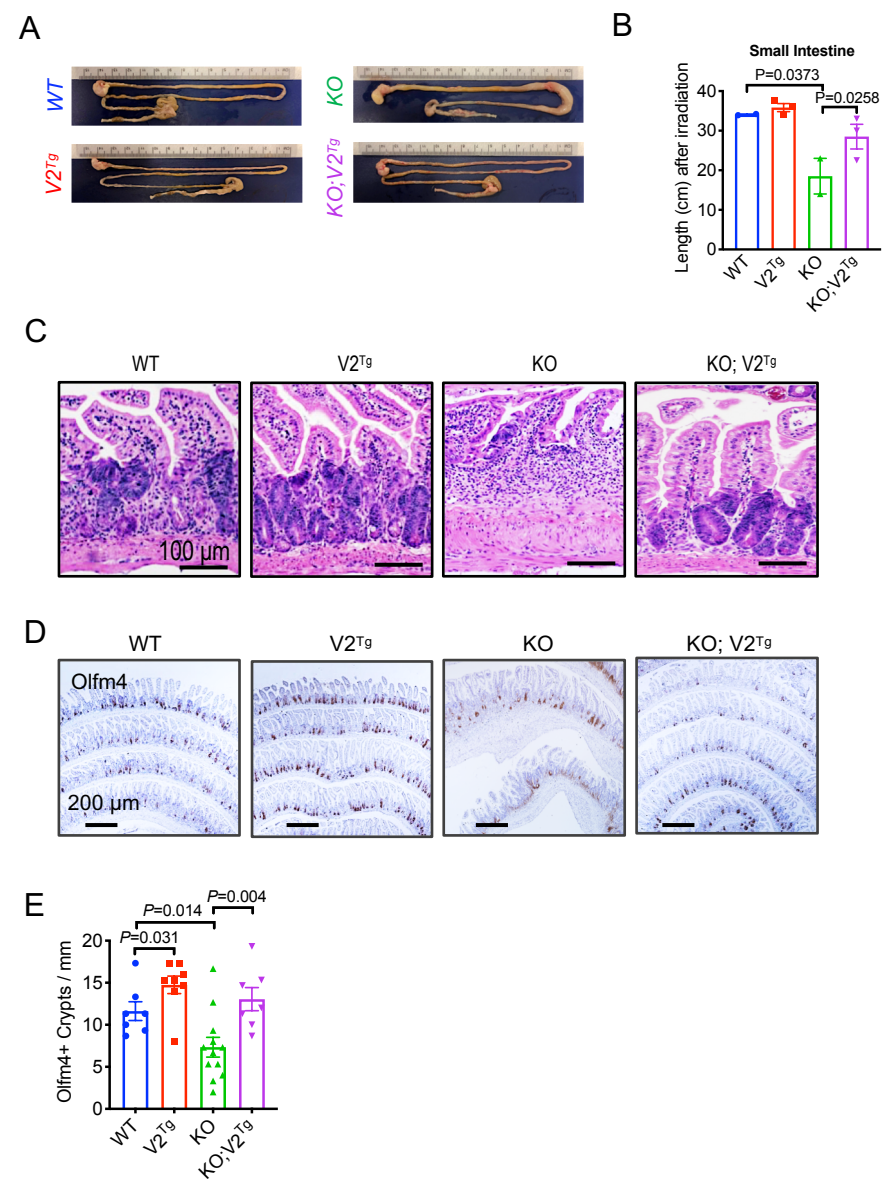

Supplement: jciinsight-5-135923-s045.pdf [file jciinsight-5-135923-s045.pdf]
